# Supplementary material for: KIF3A binds to β-arrestin for suppressing Wnt/β-catenin signalling independently of primary cilia in lung cancer
Source: PubMed Central journal article supplement (PMC5011747; doi:10.1038/srep32770), 2016-09-06
Supplement: srep32770-s1.pdf [file srep32770-s1.pdf]

## Supplementary information for

# **KIF3A binds to $\beta$ -arrestin for suppressing Wnt/ $\beta$ -catenin signalling independently of primary cilia in lung cancer**

Minsuh Kim<sup>1,3</sup>, Young-Ah Suh<sup>3</sup>, Ju-Hee Oh<sup>3</sup>, Bo Ra Lee<sup>3</sup>, Joon Kim<sup>1,2\*</sup> and Se Jin Jang<sup>3,4\*</sup>

<sup>1</sup> Biomedical science and engineering interdisciplinary program, KAIST, Daejeon, South Korea

<sup>2</sup> Graduate School of Medical Science and Engineering, KAIST, Daejeon, South Korea

<sup>3</sup> Asan Institute for Life Sciences, University of Ulsan College of Medicine, Asan Medical Center, Seoul, South Korea

<sup>4</sup> Asan Center for Cancer Genome Discovery, Department of Pathology, University of Ulsan College of Medicine, Asan Medical Center, Seoul, South Korea

\* Corresponding Authors:

Se Jin Jang, MD, PhD & Joon Kim, PhD.

## **Supplementary materials and methods**

### **Annexin-V assay**

For apoptosis analyses, we used an annexin V assay (Invitrogen). Cells treated with HPI4 were washed in ice-cold PBS without  $\text{Ca}^{2+}$  or  $\text{Mg}^{2+}$ . We then resuspended  $1 \times 10^6$  cells in 1 ml of binding buffer and 200  $\mu\text{l}$  of this cell suspension was incubated with 2  $\mu\text{l}$  of 100  $\mu\text{g}/\text{ml}$  propidium iodide and 10  $\mu\text{l}$  of Alexa Fluor® 488 annexin V for 15 min in the dark at room temperature. Flow cytometric analysis was immediately performed using a FACS Calibur Instrument (Becton Dickinson).

A549

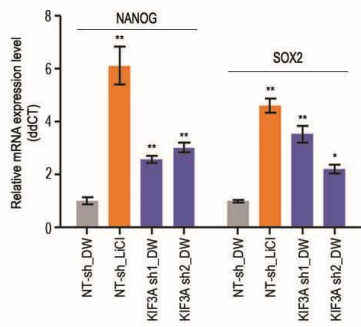

SW900

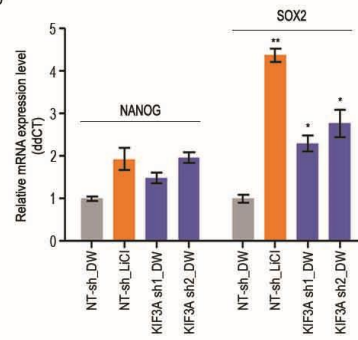

**Supplementary Figure 1. LiCl increases stemness marker expression in NT-sh cells.** Quantitative RT-PCR analysis confirming stemness marker expression in NT-sh cells treated to LiCl (20 mM) for 24 h.  $\beta$ -actin was used as an internal control for quantitative RT-PCR (n = 3; error bars indicate SEM; p-value was determined by one-way ANOVA). \*, P < 0.05; \*\*, P < 0.01.

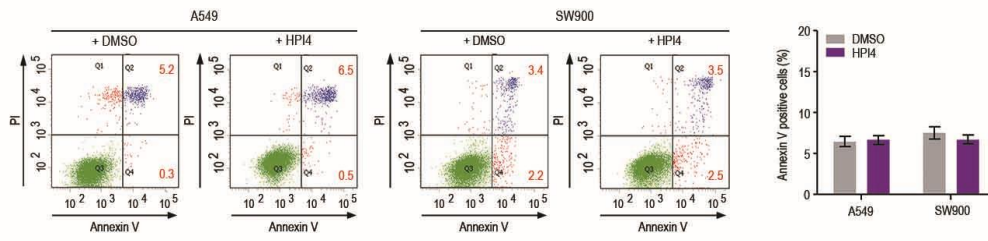

**Supplementary Figure 2. HPI4 does not induce apoptosis.** Annexin-V assay to examine apoptosis in cells treated with HPI4 (20  $\mu$ M). \*,  $P < 0.05$ ; \*\*,  $P < 0.01$ .

A549

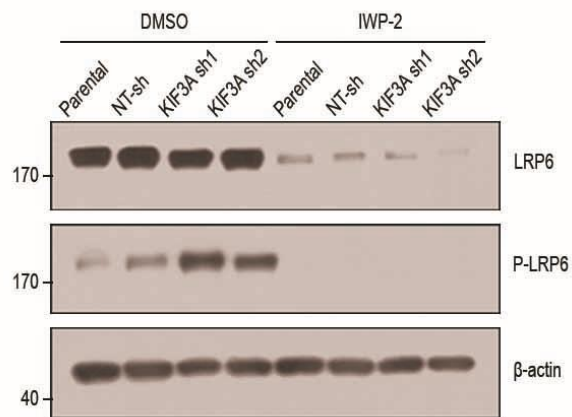

SW900

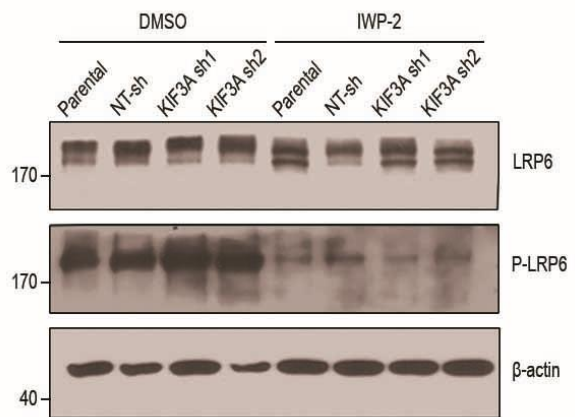

**Supplementary Figure 3. IWP-2 suppresses LRP6 and P-LRP6 expression in KIF3A knock down cells.** Immunoblot analysis showing protein levels of LRP6 and P-LRP6 after treating IWP-2 (30  $\mu$ M) for 72 h.  $\beta$ -actin was used as a loading control. Full-length blot is shown in the supplementary Figure 5, and the gels have been run under the same experimental conditions.

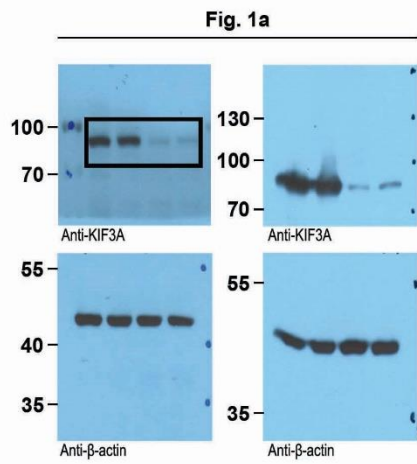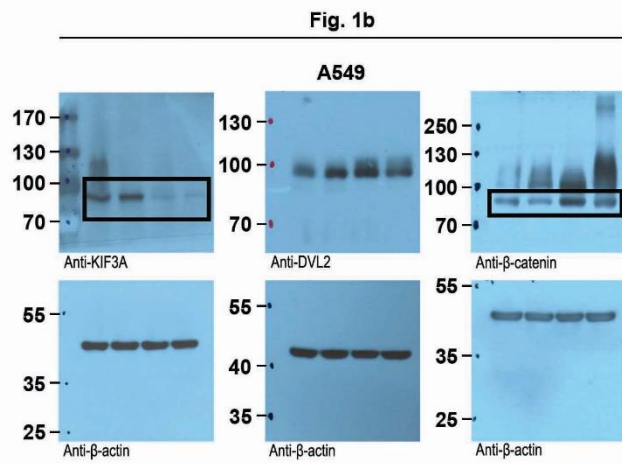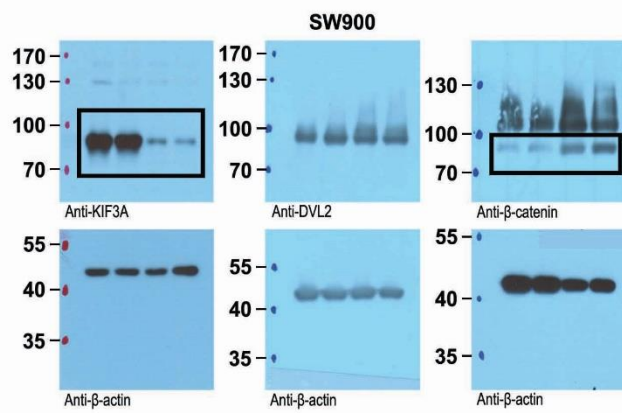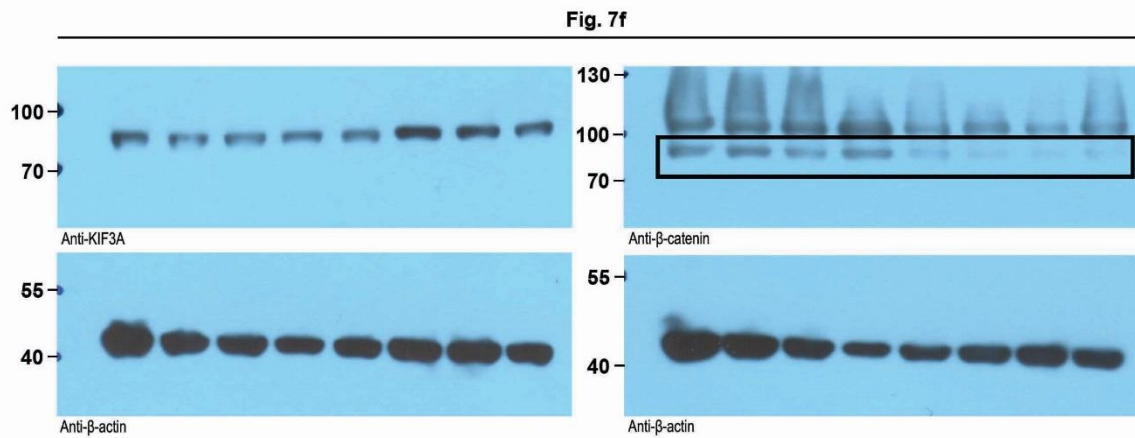

Supplementary Figure 4. Full-length blots in this study.

Fig. 6a

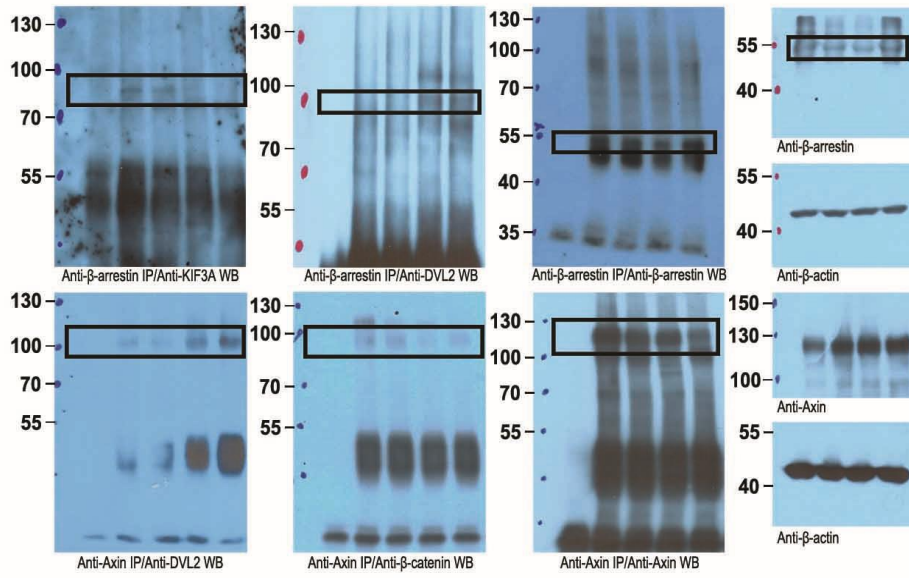

Fig. 6b

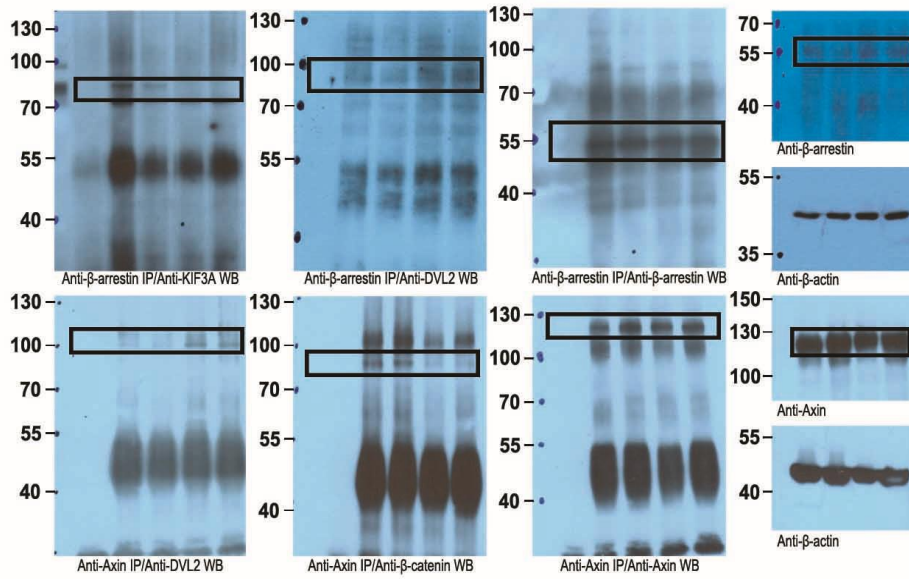

Supplementary Figure 3

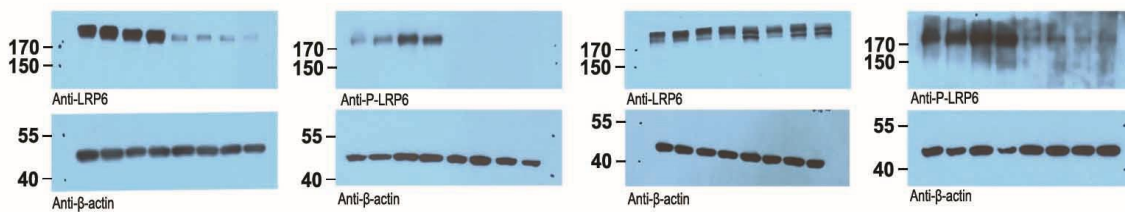

Supplementary Figure 5. Full-length blots in this study.

Supplementary Table 1. KIF3A,  $\beta$ -catenin and Cyclin D1 expression scores according to IHC analysis.

| Case # | Sex | Age | S.M.K. | KIF3A |    |    | $\beta$ -catenin |    |    | CycD1 |    |    | 1: Adenocarcinoma, 2: Squamous cell carcinoma,<br>3: Adenosquamous cell carcinoma,<br>4: Sarcomatoid carcinoma, 5: Large cell carcinoma |
|--------|-----|-----|--------|-------|----|----|------------------|----|----|-------|----|----|-----------------------------------------------------------------------------------------------------------------------------------------|
|        |     |     |        | P     | R1 | R2 | P                | R1 | R2 | P     | R1 | R2 |                                                                                                                                         |
| 1      | F   | 48  |        | 1     | 1  |    | 4                | 4  |    | 45    | 45 |    | 1                                                                                                                                       |
| 2      | M   | 32  |        | 0     | 0  | 1  | 2                | 3  | 1  | 30    | 25 | 10 | 2                                                                                                                                       |
| 3      | M   | 79  |        | 0     | 1  |    | 2                | 2  |    | 30    | 1  |    | 1                                                                                                                                       |
| 4      | F   | 54  |        | 0     | 2  |    | 3                | 3  |    | 25    | 65 |    | 1                                                                                                                                       |
| 5      | M   | 70  |        | 1     | 2  |    | 1                | 1  |    | 70    | 55 |    | 1                                                                                                                                       |
| 6      | M   | 61  |        | 1     | 2  |    | 2                | 2  |    | 1     | 1  |    | 1                                                                                                                                       |
| 7      | M   | 54  |        | 1     | 1  |    | 1                | 1  |    | 5     | 5  |    | 1                                                                                                                                       |
| 8      | M   | 52  |        | 1     | 2  |    | 2                | 1  |    | 5     | 10 |    | 2                                                                                                                                       |
| 9      | M   | 56  |        | 0     | 0  |    | 2                | 2  |    | 85    | 75 |    | 1                                                                                                                                       |
| 10     | M   | 40  |        | 1     | 1  | 2  | 1                | 1  | 4  | 70    | 5  | 25 | 1                                                                                                                                       |
| 11     | F   | 55  |        | 2     | 1  |    | 3                | 2  |    | 10    | 40 |    | 1                                                                                                                                       |
| 12     | M   | 55  |        | 1     | 0  |    | 1                | 4  |    | 80    | 5  |    | 5                                                                                                                                       |
| 13     | F   | 53  |        | 2     | 0  |    | 1                | 3  |    | 5     | 55 |    | 1                                                                                                                                       |
| 14     | M   | 36  |        | 0     | 2  |    | 3                | 1  |    | 35    | 1  |    | 2                                                                                                                                       |
| 15     | M   | 68  |        | 0     | 1  |    | 4                | 3  |    | 1     | 1  |    | 5*                                                                                                                                      |
| 16     | F   | 45  |        | 1     | 1  |    | 4                | 3  |    | 60    | 1  |    | 1                                                                                                                                       |
| 17     | M   | 57  |        | 0     | 0  |    | 3                | 3  |    | 35    | 95 |    | 2                                                                                                                                       |
| 18     | M   | 68  |        | 1     | 0  |    | 1                | 3  |    | 10    | 65 |    | 1                                                                                                                                       |
| 19     | F   | 42  |        | 0     | 2  | 0  | 1                | 4  | 4  | 15    | 40 | 20 | 1                                                                                                                                       |
| 20     | M   | 53  |        | 1     | 1  |    | 2                | 2  |    | 80    | 75 |    | 1                                                                                                                                       |



|    |   |    |  |   |      |   |   |      |   |    |      |    |    |
|----|---|----|--|---|------|---|---|------|---|----|------|----|----|
| 21 | M | 71 |  | 0 | 1    |   | 3 | 2    |   | 40 | 5    |    | 2  |
| 22 | F | 68 |  | 1 | 0    |   | 3 | 3    |   | 25 | 10   |    | 1* |
| 23 | M | 37 |  | 1 | 0    |   | 2 | 2    |   | 85 | 65   |    | 1  |
| 24 | M | 46 |  | 2 | 1    | 0 | 2 | 3    | 3 | 1  | 1    | 1  | 2  |
| 25 | F | 58 |  | 2 | n.d. |   | 4 | n.d. |   | 75 | n.d. |    | 3  |
| 26 | M | 65 |  | 0 | 2    |   | 2 | 1    |   | 20 | 30   |    | 2  |
| 27 | M | 56 |  | 1 | 1    |   | 2 | 1    |   | 10 | 5    |    | 1  |
| 28 | M | 55 |  | 0 | 1    |   | 3 | 3    |   | 15 | 15   |    | 2  |
| 29 | M | 64 |  | 0 | 1    |   | 3 | 3    |   | 25 | 15   |    | 2  |
| 30 | M | 51 |  | 1 | 0    |   | 2 | 4    |   | 60 | 40   |    | 1  |
| 31 | M | 43 |  | 0 | 1    | 1 | 3 | 2    | 3 | 35 | 50   | 35 | 2  |
| 32 | M | 61 |  | 0 | 0    | 0 | 3 | 4    | 3 | 45 | 40   | 25 | 2  |
| 33 | M | 59 |  | 2 | 1    |   | 4 | 4    |   | 35 | 65   |    | 2  |
| 34 | M | 62 |  | 2 | n.d. |   | 0 | n.d. |   | 1  | n.d. |    | 1  |
| 35 | F | 38 |  | 0 | 1    |   | 3 | 2    |   | 25 | 30   |    | 1  |
| 36 | M | 52 |  | 1 | 1    |   | 1 | 1    |   | 40 | 40   |    | 2  |
| 37 | M | 68 |  | 1 | 0    |   | 1 | 2    |   | 80 | 15   |    | 1  |
| 38 | M | 60 |  | 0 | 1    |   | 4 | 1    |   | 70 | 30   |    | 2  |
| 39 | M | 58 |  | 2 | 1    | 2 | 2 | 2    | 2 | 15 | 15   | 25 | 1  |
| 40 | M | 61 |  | 0 | 0    |   | 4 | 3    |   | 85 | 75   |    | 2  |
| 41 | M | 67 |  | 2 | 2    | 2 | 2 | 3    | 3 | 20 | 60   | 55 | 1  |
| 42 | M | 53 |  | 0 | 1    |   | 2 | 2    |   | 40 | 65   |    | 2  |
| 43 | M | 65 |  | 0 | 0    |   | 2 | 2    |   | 35 | 25   |    | 4  |
| 44 | F | 53 |  | 1 | 2    |   | 4 | 2    |   | 80 | 50   |    | 1  |

|    |   |    |  |   |      |   |   |      |   |    |      |    |   |
|----|---|----|--|---|------|---|---|------|---|----|------|----|---|
| 45 | M | 51 |  | 1 | n.d. |   | 3 | n.d. |   | 1  | n.d. |    | 1 |
| 46 | M | 69 |  | 1 | 1    |   | 2 | 3    |   | 40 | 25   |    | 2 |
| 47 | F | 67 |  | 2 | 2    |   | 3 | 4    |   | 50 | 65   |    | 1 |
| 48 | M | 56 |  | 0 | n.d. |   | 4 | n.d. |   | 55 | n.d. |    | 1 |
| 49 | M | 61 |  | 1 | 2    |   | 1 | 2    |   | 5  | 40   |    | 2 |
| 50 | M | 65 |  | 2 | 2    |   | 3 | 3    |   | 15 | 25   |    | 1 |
| 51 | M | 60 |  | 0 | 1    |   | 1 | 1    |   | 20 | 5    |    | 2 |
| 52 | M | 71 |  | 1 | 0    |   | 4 | 4    |   | 45 | 75   |    | 2 |
| 53 | M | 71 |  | 0 | n.d. |   | 3 | n.d. |   | 55 | n.d. |    | 2 |
| 54 | M | 73 |  | 2 | 2    |   | 2 | 1    |   | 15 | 0    |    | 2 |
| 55 | M | 60 |  | 2 | 2    |   | 2 | 4    |   | 35 | 25   |    | 1 |
| 56 | M | 72 |  | 1 | 1    |   | 2 | 2    |   | 35 | 5    |    | 1 |
| 57 | M | 70 |  | 2 | 2    |   | 1 | 1    |   | 5  | 5    |    | 1 |
| 58 | F | 38 |  | 2 | 1    |   | 1 | 1    |   | 1  | 30   |    | 1 |
| 59 | M | 45 |  | 1 | 2    |   | 4 | 3    |   | 45 | 50   |    | 1 |
| 60 | M | 68 |  | 2 | 1    | 1 | 1 | 2    | 2 | 45 | 5    | 50 | 1 |
| 61 | F | 46 |  | 0 | 2    |   | 3 | 2    |   | 55 | 40   |    | 1 |
| 62 | M | 53 |  | 0 | 2    |   | 2 | 2    |   | 1  | 1    |    | 2 |
| 63 | F | 70 |  | 1 | 1    |   | 1 | 1    |   | 10 | 10   |    | 1 |
| 64 | M | 54 |  | 1 | 1    |   | 4 | 4    |   | 60 | 85   |    | 1 |
| 65 | M | 70 |  | 1 | 0    |   | 2 | 3    |   | 45 | 5    |    | 2 |
| 66 | M | 50 |  | 0 | 0    |   | 2 | 4    |   | 60 | 70   |    | 2 |
| 67 | M | 71 |  | 0 | 2    |   | 3 | 1    |   | 15 | 70   |    | 2 |
| 68 | M | 64 |  | 2 | 1    |   | 2 | 2    |   | 15 | 10   |    | 1 |

|    |   |    |  |   |   |   |   |   |   |    |     |    |    |
|----|---|----|--|---|---|---|---|---|---|----|-----|----|----|
| 69 | M | 54 |  | 2 | 2 |   | 2 | 2 |   | 25 | 30  |    | 1  |
| 70 | M | 51 |  | 2 | 2 | 0 | 2 | 2 | 3 | 5  | 5   | 1  | 1  |
| 71 | F | 60 |  | 2 | 2 |   | 2 | 3 |   | 30 | 10  |    | 1  |
| 72 | F | 62 |  | 0 | 1 |   | 3 | 2 |   | 25 | 45  |    | 1  |
| 73 | F | 45 |  | 0 | 2 |   | 3 | 3 |   | 40 | 35  |    | 1  |
| 74 | F | 61 |  | 0 | 1 |   | 3 | 3 |   | 50 | 65  |    | 1  |
| 75 | M | 51 |  | 2 | 2 | 2 | 3 | 2 | 2 | 55 | 95  | 75 | 1  |
| 76 | M | 50 |  | 2 | 2 |   | 2 | 3 |   | 15 | 60  |    | 1  |
| 77 | M | 60 |  | 2 | 1 |   | 4 | 4 |   | 55 | 50  |    | 2* |
| 78 | M | 57 |  | 2 | 1 |   | 2 | 3 |   | 45 | 85  |    | 1  |
| 79 | M | 60 |  | 2 | 1 |   | 1 | 2 |   | 15 | 50  |    | 1  |
| 80 | M | 56 |  | 0 | 2 |   | 3 | 3 |   | 30 | 35  |    | 1  |
| 81 | M | 59 |  | 2 | 0 |   | 1 | 1 |   | 15 | 5   |    | 1  |
| 82 | F | 37 |  | 0 | 1 | 1 | 4 | 3 | 2 | 85 | 25  | 60 | 1  |
| 83 | F | 61 |  | 1 | 1 | 1 | 2 | 2 | 2 | 1  | 5   | 15 | 1  |
| 84 | M | 75 |  | 2 | 2 |   | 2 | 4 |   | 1  | 25  |    | 2  |
| 85 | M | 66 |  | 2 | 2 |   | 1 | 1 |   | 15 | 30  |    | 1  |
| 86 | F | 63 |  | 1 | 1 |   | 1 | 1 |   | 25 | 50  |    | 1  |
| 87 | M | 68 |  | 2 | 2 |   | 1 | 2 |   | 5  | 35  |    | 1  |
| 88 | F | 58 |  | 0 | 0 |   | 2 | 3 |   | 5  | 1   |    | 1  |
| 89 | M | 74 |  | 1 | 2 | 2 | 2 | 2 | 3 | 45 | 55  | 15 | 2  |
| 90 | M | 57 |  | 1 | 1 |   | 2 | 2 |   | 70 | 60  |    | 1  |
| 91 | M | 56 |  | 1 | 2 |   | 3 | 2 |   | 80 | 100 |    | 2  |
| 92 | M | 57 |  | 2 | 2 |   | 1 | 2 |   | 25 | 10  |    | 1  |

|     |   |    |  |   |      |   |   |      |   |    |      |    |   |
|-----|---|----|--|---|------|---|---|------|---|----|------|----|---|
| 93  | M | 68 |  | 0 | 1    |   | 1 | 2    |   | 10 | 15   |    | 2 |
| 94  | M | 60 |  | 1 | n.d. |   | 2 | n.d. |   | 60 | n.d. |    | 2 |
| 95  | M | 66 |  | 2 | 0    |   | 2 | 0    |   | 15 | 5    |    | 2 |
| 96  | F | 67 |  | 1 | 0    |   | 2 | 2    |   | 30 | 15   |    | 1 |
| 97  | M | 63 |  | 2 | 2    |   | 2 | 3    |   | 10 | 20   |    | 2 |
| 98  | F | 64 |  | 2 | 2    |   | 2 | 1    |   | 5  | 25   |    | 1 |
| 99  | F | 56 |  | 2 | 2    |   | 3 | 2    |   | 5  | 25   |    | 1 |
| 100 | M | 54 |  | 2 | 2    |   | 2 | 3    |   | 10 | 10   |    | 1 |
| 101 | M | 61 |  | 0 | 2    |   | 3 | 2    |   | 75 | 5    |    | 2 |
| 102 | M | 65 |  | 0 | 1    |   | 3 | 2    |   | 70 | 10   |    | 2 |
| 103 | M | 58 |  | 2 | 2    | 0 | 1 | 1    | 2 | 1  | 1    | 20 | 1 |
| 104 | F | 44 |  | 2 | 2    |   | 1 | 3    |   | 5  | 10   |    | 1 |
| 105 | M | 75 |  | 1 | 1    | 0 | 1 | 3    | 2 | 10 | 50   | 25 | 2 |
| 106 | F | 50 |  | 1 | 1    |   | 1 | 3    |   | 20 | 35   |    | 1 |
| 107 | M | 71 |  | 2 | 2    |   | 4 | 4    |   | 5  | 5    |    | 2 |
| 108 | M | 55 |  | 2 | 0    | 2 | 1 | 2    | 2 | 5  | 25   | 25 | 1 |
| 109 | F | 76 |  | 1 | 2    |   | 4 | 4    |   | 85 | 20   |    | 1 |
| 110 | M | 66 |  | 1 | 1    |   | 2 | 1    |   | 20 | 65   |    | 2 |

n.d; IHC data not done, M; male, F; female, S.M.K. (Smoking status): dark gray; ever smoker, empty; never smoker. P; primary, R1; 1st recurred tumors, R2; 2nd recurred tumors, score 4 in  $\beta$ -catenin score; nuclear expression, n\*; recurred tumor showed different histologic feature with primary tumor.

**Supplementary Table 2. Clinic characteristics of patient-derived primary NSCLC cells.**

| <b>PCC #</b> | <b>Sex</b> | <b>Age</b> | <b>Histology</b>        |
|--------------|------------|------------|-------------------------|
| PCC1         | 58         | F          | Adenocarcinoma          |
| PCC2         | 60         | F          | Adenocarcinoma          |
| PCC3         | 60         | F          | Sarcomatoid carcinoma   |
| PCC4         | 72         | M          | Squamous cell carcinoma |
| PCC5         | 66         | M          | Squamous cell carcinoma |
| PCC6         | 54         | M          | Squamous cell carcinoma |
| PCC7         | 61         | M          | Adenocarcinoma          |
| PCC8         | 72         | F          | Adenocarcinoma          |

**Supplementary Table 3. The list of primer sequences used for quantitative RT-PCR and RT-PCR.**

| <b>Gene</b>    | <b>Primer name</b> | <b>Primer sequence</b>          |
|----------------|--------------------|---------------------------------|
| NANOG          | NANOG_f            | 5'-CTAAGAGGTGGCAGAAAAACA-3'     |
|                | NANOG_R            | 5'-CTGGTGGTAGGAAGAGTAAAGG-3'    |
| OCT4           | OCT4_f             | 5'-GACAACAATGAAAATCTTCAGGAGA-3' |
|                | OCT4_R             | 5'-CTGGCGCCGGTTACAGAACCA-3      |
| SOX2           | SOX2_f             | 5'-ACGACGTGAGCGCCCTGCAGTACAA-3' |
|                | SOX2_R             | 5'-GCTGGAGCTGGCCTCGGACTTGACC-3' |
| $\beta$ -actin | $\beta$ -actin_f   | 5'-AGAGCTACGAGCTGCCTGAC-3'      |
|                | $\beta$ -actin_R   | 5'-AGCACTGTGTTGGCGTACAG-3'      |
| GAPDH          | GAPDH_f            | 5'-AGCCACATCGCTCAGACAC-3'       |
|                | GAPDH_R            | 5'-GCCCAATACGACCAAATCC-3'       |
